# Supplementary material for: Effects of the acanthocephalan Polymorphus minutus and the microsporidian Dictyocoela duebenum on energy reserves and stress response of cadmium exposed Gammarus fossarum
Source: PubMed Central journal article supplement (PMC4631464; doi:10.7717/peerj.1353), 2015-10-29

Supplemental figure S1. The infection percentage of microsporidians in *G. fossarum*. (A) males and (B) females. DICT: *Dictyocoela duebenum*, M505: *Microsporidium* sp. 505, MH: *Cystosporogenes* sp.

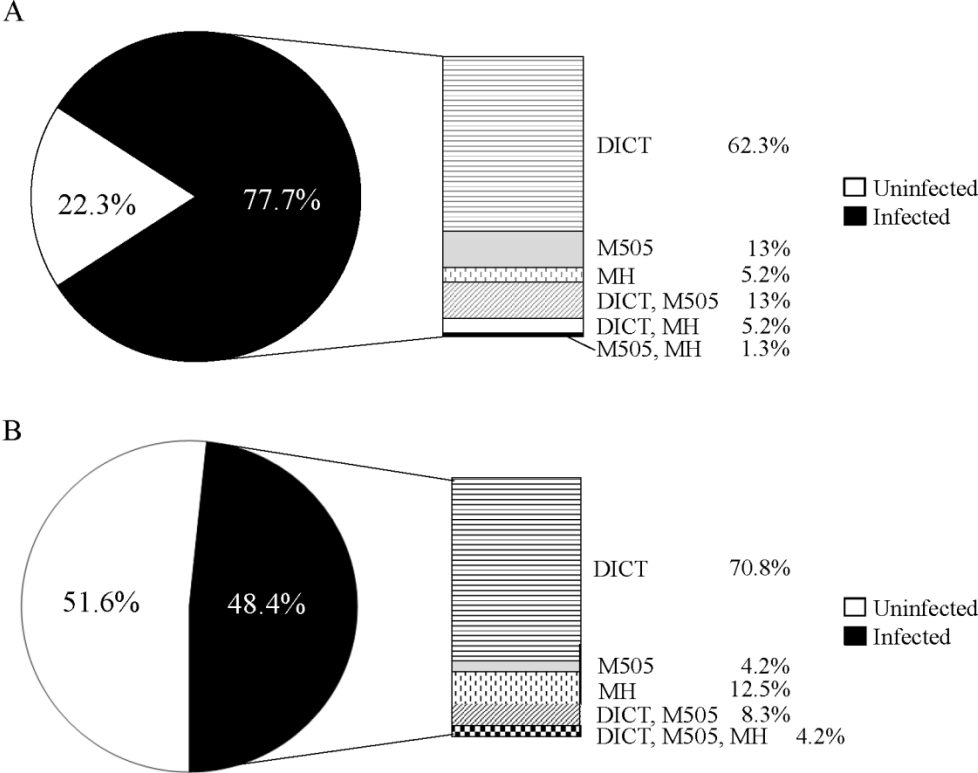

Supplement: peerj-03-1353-s001.pdf [file peerj-03-1353-s001.pdf]
