# Supplementary material for: Effects of the acanthocephalan Polymorphus minutus and the microsporidian Dictyocoela duebenum on energy reserves and stress response of cadmium exposed Gammarus fossarum
Source: PubMed Central journal article supplement (PMC4631464; doi:10.7717/peerj.1353), 2015-10-29
Supplement: peerj-03-1353-s002.pdf [file peerj-03-1353-s002.pdf]

**Supplemental table S1.** Prevalence of acanthocephalans and microsporidians in *G. fossarum* by sex.

| Sex    | Acanthocephala                     |                  | Microspora                         |                  | Acanthocephala + Microspora |
|--------|------------------------------------|------------------|------------------------------------|------------------|-----------------------------|
|        | No. of examined <i>G. fossarum</i> | No. infected (%) | No. of examined <i>G. fossarum</i> | No. infected (%) | No. infected (%)            |
| Male   | 160                                | 88 (55.0)        | 121                                | 94 (77.7)        | 46 (38.0)                   |
| Female | 139                                | 55 (39.6)        | 91                                 | 44 (48.4)        | 10 (11.0)                   |
| Total  | 299 <sup>a</sup>                   | 143(47.8)        | 212 <sup>a</sup>                   | 138 (65.1)       | 56 (26.4)                   |

<sup>a</sup>The difference between no. of individuals examined for microsporidians and acanthocephalans is due to the fact that the gammarids used for metal analysis could not be tested for microsporidians by PCR.
