# Supplementary material for: Effects of the acanthocephalan Polymorphus minutus and the microsporidian Dictyocoela duebenum on energy reserves and stress response of cadmium exposed Gammarus fossarum
Source: PubMed Central journal article supplement (PMC4631464; doi:10.7717/peerj.1353), 2015-10-29
Supplement: peerj-03-1353-s003.pdf [file peerj-03-1353-s003.pdf]

Supplementary file 1: Output of GLS model analysis for the three biomarkers

Glycogen

Generalized least squares fit by REML  
Model: gylco ~ sex \* expo \* micro \* acantho  
Data: dat  
AIC BIC logLik  
993.2456 1075.965 -464.6228

Coefficients:

|                            | Value     | Std.Error | t-value   | p-value |
|----------------------------|-----------|-----------|-----------|---------|
| (Intercept)                | 103.36645 | 8.91557   | 11.593931 | 0.0000  |
| sexM                       | -18.84168 | 12.29646  | -1.532285 | 0.1287  |
| expoy                      | -23.62171 | 10.78586  | -2.190063 | 0.0309  |
| microY                     | -18.78795 | 10.90239  | -1.723288 | 0.0880  |
| acanthoY                   | -14.67749 | 12.19726  | -1.203342 | 0.2317  |
| sexM:expoy                 | 51.97868  | 19.30738  | 2.692167  | 0.0083  |
| sexM:microY                | 35.74096  | 16.78268  | 2.129634  | 0.0357  |
| expoy:microY               | 47.70546  | 17.46446  | 2.731574  | 0.0075  |
| sexM:acanthoY              | -0.18987  | 16.11392  | -0.011783 | 0.9906  |
| expoy:acanthoY             | 19.01391  | 14.82334  | 1.282701  | 0.2026  |
| microY:acanthoY            | 23.16799  | 27.60219  | 0.839353  | 0.4033  |
| sexM:expoy:microY          | -82.02478 | 28.95110  | -2.833218 | 0.0056  |
| sexM:expoy:acanthoY        | -35.47733 | 23.80081  | -1.490594 | 0.1393  |
| sexM:microY:acanthoY       | -1.69905  | 33.75448  | -0.050335 | 0.9600  |
| expoy:microY:acanthoY      | -26.13366 | 31.33908  | -0.833900 | 0.4064  |
| sexM:expoy:microY:acanthoY | 34.42319  | 43.77138  | 0.786431  | 0.4335  |

Standardized residuals:

| Min          | Q1           | Med          | Q3          | Max         |
|--------------|--------------|--------------|-------------|-------------|
| -1.908573640 | -0.785069399 | -0.006772025 | 0.657909605 | 2.405262368 |

Residual standard error: 23.95254  
Degrees of freedom: 114 total; 98 residual

Lipids

> summary(lm.lip2)  
Generalized least squares fit by REML  
Model: lipid ~ expo \* micro \* acantho \* sex  
Data: dat  
AIC BIC logLik  
951.1571 1033.876 -443.5786

Coefficients:

|                            | Value      | Std.Error | t-value   | p-value |
|----------------------------|------------|-----------|-----------|---------|
| (Intercept)                | 63.58453   | 6.01333   | 10.573927 | 0.0000  |
| expoy                      | -1.18338   | 7.51349   | -0.157500 | 0.8752  |
| microY                     | 43.78499   | 11.76413  | 3.721906  | 0.0003  |
| acanthoY                   | -16.30843  | 8.62651   | -1.890501 | 0.0616  |
| sexM                       | -11.27344  | 9.75168   | -1.156052 | 0.2505  |
| expoy:microY               | -52.36746  | 28.61114  | -1.830317 | 0.0702  |
| expoy:acanthoY             | -0.92009   | 10.79655  | -0.085221 | 0.9323  |
| microY:acanthoY            | -60.39784  | 25.45776  | -2.372473 | 0.0196  |
| expoy:sexM                 | -13.59747  | 11.02799  | -1.232995 | 0.2205  |
| microY:sexM                | -16.43530  | 18.04145  | -0.910975 | 0.3645  |
| acanthoY:sexM              | 2.93684    | 12.78824  | 0.229652  | 0.8188  |
| expoy:microY:acanthoY      | 83.65573   | 36.74694  | 2.276536  | 0.0250  |
| expoy:microY:sexM          | 57.33865   | 34.76548  | 1.649298  | 0.1023  |
| expoy:acanthoY:sexM        | 19.85508   | 15.01409  | 1.322430  | 0.1891  |
| microY:acanthoY:sexM       | 58.95679   | 30.26519  | 1.948007  | 0.0543  |
| expoy:microY:acanthoY:sexM | -100.82167 | 43.85624  | -2.298913 | 0.0236  |

Standardized residuals:

| Min        | Q1         | Med        | Q3        | Max       |
|------------|------------|------------|-----------|-----------|
| -1.6080933 | -0.6869587 | -0.1507333 | 0.7022971 | 2.4488657 |

## hsp70

Generalized least squares fit by REML  
Model: hsp ~ sex \* expoy \* microY \* acanthoY  
Data: dat  
AIC BIC logLik  
417.3562 498.3994 -176.6781

### Coefficients:

|                            | Value     | Std.Error | t-value   | p-value |
|----------------------------|-----------|-----------|-----------|---------|
| (Intercept)                | 3.236709  | 0.361425  | 8.955398  | 0.0000  |
| sexM                       | 0.777097  | 0.798981  | 0.972610  | 0.3333  |
| expoy                      | 0.482949  | 0.534040  | 0.904332  | 0.3682  |
| microY                     | -0.686953 | 0.521958  | -1.316107 | 0.1914  |
| acanthoY                   | 1.033026  | 0.573762  | 1.800441  | 0.0750  |
| sexM:expoy                 | -0.157588 | 1.186726  | -0.132792 | 0.8946  |
| sexM:microY                | -0.895088 | 0.982715  | -0.910832 | 0.3647  |
| expoy:microY               | 3.860698  | 1.507044  | 2.561768  | 0.0120  |
| sexM:acanthoY              | -2.058475 | 1.030372  | -1.997797 | 0.0487  |
| expoy:acanthoY             | -1.213994 | 0.746596  | -1.626039 | 0.1073  |
| microY:acanthoY            | 0.935808  | 2.129076  | 0.439537  | 0.6613  |
| sexM:expoy:microY          | -0.571790 | 2.069833  | -0.276249 | 0.7830  |
| sexM:expoy:acanthoY        | 1.647666  | 1.501877  | 1.097072  | 0.2754  |
| sexM:microY:acanthoY       | -0.260797 | 2.362173  | -0.110405 | 0.9123  |
| expoy:microY:acanthoY      | -3.831775 | 2.674886  | -1.432500 | 0.1554  |
| sexM:expoy:microY:acanthoY | 2.262589  | 3.254903  | 0.695132  | 0.4887  |

### Standardized residuals:

| Min         | Q1          | Med         | Q3         | Max        |
|-------------|-------------|-------------|------------|------------|
| -1.79856503 | -0.70711560 | -0.03308062 | 0.79016412 | 1.81137055 |

Residual standard error: 2.015426  
Degrees of freedom: 109 total; 93 residual
