# Supplementary material for: Effects of the acanthocephalan Polymorphus minutus and the microsporidian Dictyocoela duebenum on energy reserves and stress response of cadmium exposed Gammarus fossarum
Source: PeerJ. 2015 Oct 29;3:e1353. doi: 10.7717/peerj.1353 (PMC4631464; doi:10.7717/peerj.1353)
Supplement: Supplemental Information 1 — Raw data obtained from the experiments [file peerj-03-1353-s004.xlsx]

## Sheet: Waterconcentrations
time [h]	control			Cd
0	0.092879	0.105263	0.065015	3.63468	3.58333	3.61364
0.083333	0.108359	0.077399	0.065015	3.27554	2.94697	3.34849
0.166667	0.080495	0.089783	0.089783	2.50155	2.56061	3.375
0.333333	0.086687	0.145511	0.086687	3.33746	2.5303	3.18561
0.5	0.077399	0.077399	0.126935	2.66873	3.14773	3.5303
1	0.052632	0.120743	0.108359	2.93498	3.33333	3.50758
2	0.065015	0.102167	0.114551	3.10836	3.10606	3.74621
4	0.065015	0.105263	0.077399	2.7709	3.23864	3.05303
24	0.071207	0.139319	0.142415	2.91331	2.80682	2.93561
48	0.083591	0.083591	0.099071	2.24458	2.98485	2.66667
72	0.114551	0.089783	0.074303	2.66254	3.00758	2.66667
96	0.095975	0.114551	0.095975	2.4582	2.50758	2.42803
120	0.083591	0.117647	0.117647	2.19505	2.69697	2.43939
148	0.099071	0.105263	0.095975	2	2.60227	1.95076
172	0.108359	0.111455	0.095975	2.29102	2.76894	2.26136

## Sheet: Tissue concentrations
Control f	C infected f	Cd f	Cd infected f	Control m	C infected m	Cd m	Cd infected m	Control Cyst	Cd Cyst
0.181729	0.189941	1.87093	1.69319	0.152401	0.172521	1.19182	1.5825	0.090882	0.425511
0.188829	0.151993	2.00952	1.63041	0.179958	0.185584	1.40599	1.32083

## Sheet: mortality rate
	control_inf	control_uninf	Cd_inf	Cd_uninf
Tank1	0.133333	0.117647	0.0666667	0.294118
Tank2	0.142857	0.235294	0.2	0.235294
Tank3	0.25	0.1875	0.1875	0.125
Tank4	0.2	0.235294	0.4	0.235294
Tank5	0.266667	0	0.1875	0.5
Tank6	0.2	0.25	0.533333	0.235294

## Sheet: weight of gammarids
female	Acant female	Mic, female	Acant, Mic, female	male	Acant, male	Mic, male	Acant, Mic, male
24	17.6	23.1	29.2	29.8	14.8	25.3	21.4
20.6	20.5	23	12.9	24.7	16.2	41.6	30.2
21.4	14.2	19.2	26.4	25.3	23.2	23.5	20.3
15.7	22.6	18.1		24.3	35.5	16.2	36.5
22.6	17.3	19.3		38.1	19.8	29.1	16.7
24.6	16	20.2		24.4	29.4	35.5	17.2
22.2	16.5	22.4		21.3	25.9	28.8	13.3
21.4	18.3	16.8		27	28.9	17	16.7
34	17.6	20.4		21.3	17.7	38.5	21.9
16.4	15.3	19.7		37.6	28.3	41.7	23
21.8	16.4			35.4	18.4	23.3	23.9
17.8	23.9			39.5	21.6	32	27.7
27.7	20.3				26.5	20.2	23.6
17.9	15.3					32.4	27.4
23.8						21	24
20.1						28.7	25.8
10.2							25.4
25.9							18.4
16.4							14.6
19.4
20.3
19.7
15.3
23.5
15.1
16.3
21.2

## Sheet: Glycogen
C, f	C, A, f	C, M, f	C, A, M, f	Cd, f	Cd, A, f	Cd, M, f	Cd, A, M, f	C, m	C, A, m	C, M, m	C, A, M, m	Cd, m	Cd, A, m	Cd, M, m	Cd, A, M, m
153.898	108.811	89.855	93.069	59.008	94.41	78.157	110.067	61.919	55.575	86.817	116.712	96.505	100.096	118.094	155.638
92.237	109.848	98.898		112.779	85.617	109.793	109.999	78.463	94.792	66.448	69.476	144.501	58.636	137.607	119.157
73.468	110.077	93.334		87.723	98.39	108.715		91.388	78.108	77.346	171.151	84.858	113.122	48.072	104.79
112.652	91.314	55.243		83.114	100.649	137.984		65.598	63.967	151.605	141.638	125.663	75.582	62.188	78.952
72.605	74.338	87.371		56.411	73.135			89.862	71.2928	111.176	189.566		82.0637	99.363	61.847
139.231	69.9097	82.77		136.292	78.65			133.19	54.2097	101.09	70.355		72.8844	133.766	57.29
158.424	56.5251			66.0271	57.7172			60.8889		130.699	62.911		68.4728	69.518	99.044
98.3264				71.2731				94.8893		72.121	117.843				74.827
86.7472				81.7261						115.998	79.522
95.0435				82.5506							68.346
79.6462				66.6309							101.353
78.1186				61.6482
				109.275
				65.4764
				56.2368
C= control
A= acanthocephalan infection
M= Microsporidian infection
Cd= cadmium
f= female
m= male

## Sheet: Lipids
C, f	C, A, f	C, M, f	C, A, M, f	Cd, f	Cd, A, f	Cd, M, f	Cd, A, M, f	C, m	C, A, m	C, M, m	C, A, M, m	Cd, m	Cd, A, m	Cd, M, m	Cd, A, M, m
53.049	47.309	99.4961	30.6633	49.399	53.681	130.781	60.2736	29.676	28.207	74.9933	59.5248	42.249	55.145	72.1177	83.2235
62.411	52.866	106.271		53.624	50.232	26.8433	59.4225	49.917	46.905	52.8339	42.9152	41.145	32.278	143.302	77.7043
52.194	55.643	67.6431		43.726	25.282	25.7667		33.668	31.975	57.2619	65.2459	31.831	46.494	58.4667	89.3309
56.08	42.783	103.505		54.349	43.658	31.8839		46.275	27.744	162.831	44.9656	34.896	28.459	65.2935	39.3265
36.746	33.806	129.82		35.66	46.666			42.885	62.3292	85.8392	118.821		50.3311	72.8346	65.098
49	23.8075	137.482		40.092	34.208			93.369	36.4768	89.8952	57.1279		47.8733	57.6211	55.2986
94.2079	74.7182			57.9487	62.4814			46.181		60.8145	61.4173		41.0751	19.3226	24.3071
44.5687				57.8267				76.5177		56.019	89.0178				20.1715
90.5556				80.041						76.4588	45.9252
61.714				81.0624							45.0368
60.1771				78.6781							83.332
102.311				64.3519
				96.4241
				78.4846
				64.3498
C= control
A= acanthocephalan infection
M= Microsporidian infection
Cd= cadmium
f= female
m= male

## Sheet: hsp70
C, f	C, A, f	C, M, f	C, A, M, f	Cd, f	Cd, A, f	Cd, M, f	Cd, A, M, f	C, m	C, A, m	C, M, m	C, A, M, m	Cd, m	Cd, A, m	Cd, M, m	Cd, A, M, m
4.07358	5.93732	3.39937	4.51859	3.52511	4.83746	3.66337	3.07506	7.47065	3.62253	4.10447	1.30437	3.97871	6.5842	4.22975	5.21526
3.39163	5.36454	1.0765		2.87018	2.90164	9.23879	4.55788	6.29884	3.55279	3.12122	0.220858	3.48292	2.0409	3.99631	1.08234
4.30744	3.1458	2.74859		4.29954	3.14181	9.03949		4.93351	2.76023	1.33178	0.422295	3.2473	3.56328	5.59424	2.78975
5.39454	2.55097	2.51924		2.14112	4.12938	5.63195		3.06698	0.899907	0.136197	3.03497	6.64774	4.8738	3.54867	7.72724
4.02546	4.41373	1.99707		6.05846	3.62367			3.23955	2.84652	1.36778	2.30424		2.41418	8.16321	6.97069
2.21119	4.48349	3.55777		3.90332	3.21669			3.08447	4.24817	2.07439	1.78657		3.82662	8.14611	6.09242
2.91405	3.9923			2.07906	2.92018			1.93144		3.62661	3.23314		2.92876	8.64395	1.99088
3.26684				5.86806				2.08502		3.31199	3.39116				4.6121
2.98831				3.389						2.81144	1.34376
1.32074				3.01762							3.73242
1.71002				3.76479							2.12081
C= control
A= acanthocephalan infection
M= Microsporidian infection
Cd= cadmium
f= female
m= male
